# Supplementary material for: Computational Analysis of the Interaction Energies between Amino Acid Residues of the Measles Virus Hemagglutinin and Its Receptors
Source: PubMed Central journal article supplement (PMC5977229; doi:10.3390/v10050236), 2018-05-03
Supplement: viruses-10-00236-s001.pdf [file viruses-10-00236-s001.pdf]

**Supplementary Material for**

**“Computational Analysis of the Interaction Energies between**

**Amino Acid Residues of the Measles Virus Hemagglutinin and**

**Its Receptors”**

**Fengqi Xu<sup>1</sup>, Shigenori Tanaka<sup>1\*</sup>, Hirofumi Watanabe<sup>2</sup>, Yasuhiro Shimane<sup>3</sup>, Misako Iwasawa<sup>4</sup>, Kazue Ohishi<sup>5</sup>, Tadashi Maruyama<sup>3</sup>**

<sup>1</sup> Department of Computational Science, Graduate School of System Informatics, Kobe University, 1-1, Rokkodai, Nada-ku, Kobe, Hyogo 657-8501, Japan

<sup>2</sup> Education Center on Computational Science and Engineering, Kobe University, 7-1-48, Minatojimaminamimachi, Chuo-ku, Kobe 650-0047, Japan

<sup>3</sup> Center for Marine Biosciences, Japan Agency for Marine-Earth Science and Technology, 2-15, Natsushima, Yokosuka, Kanagawa 237-0061, Japan

<sup>4</sup> Center for Earth Information Science and Technology, Japan Agency for Marine-Earth Science and Technology, 2-15, Natsushima, Yokosuka, Kanagawa 237-0061, Japan

<sup>5</sup> Faculty of Engineering, Tokyo Polytechnic University, 1583, Iiyama, Atsugi, Kanagawa 243-0297, Japan

\*Correspondence: [tanaka2@kobe-u.ac.jp](mailto:tanaka2@kobe-u.ac.jp); Tel: +81-78-803-6620

Table S1 shows the second and third most important amino-acid (a.a.) residues in (a) SLAM, (b) Nectin-4, and (c) CD46 receptors (designated as “2<sup>nd</sup> receptor a.a.” and “3<sup>rd</sup> receptor a.a.”, respectively) which have strongly attractive interactions with the higher ranked residues in MVH (second column in Table S1) shown in Table 2 in the main text. The 1<sup>st</sup> amino-acid (a.a.) residues which showed the highest IFIEs are shown in Table 2 in the main text. The “+” and “-” symbols in the parentheses after the residue names refer to the positively and negatively charged residues, respectively. The “n” symbol indicates that there is no residue in the receptor within the distance of 5 Å from the respective MVH residue. The “—” symbol indicates that the pertinent residue in the receptor shows the (small) repulsive interaction with the respective MVH residue.

Table S2 shows the effects of amino-acid (a.a.) substitution G546S of MVH on the distances and the IFIEs between the residues of the Chain D of CD46 and the respective corresponding residues of MVH.

Table S1. The second and third most important amino-acid (a.a.) residues in (a) SLAM, (b) Nectin-4, and (c) CD46 receptors (designated as “2<sup>nd</sup> receptor a.a.” and “3<sup>rd</sup> receptor a.a.”, respectively) which have strongly attractive interactions with the higher ranked residues in MVH (second column below) shown in Table 2 in the main text.

| (a) SLAM |           |                               |                 |                               |                 |
|----------|-----------|-------------------------------|-----------------|-------------------------------|-----------------|
| Rank     | MVH a.a.  | 2 <sup>nd</sup> receptor a.a. | IFIE (kcal/mol) | 3 <sup>rd</sup> receptor a.a. | IFIE (kcal/mol) |
| 1        | Asp507(-) | Arg90(+)                      | -53.14          | n                             | n               |
| 2        | Asp505(-) | Ile78                         | -0.96           | Leu92                         | -0.41           |
| 3        | Arg533(+) | Ser80                         | -3.80           | Ile62                         | -2.27           |
| 4        | Arg556(+) | Ile126                        | -14.89          | Asn125                        | -13.61          |
| 5        | Asp530(-) | Ser80                         | -1.20           | n                             | n               |
| 6        | Glu503(-) | Leu92                         | -10.71          | Asn76                         | -6.05           |
| 7        | Arg195(+) | Gln129                        | -7.26           | Val128                        | -2.94           |
| 8        | Thr193    | Phe131                        | -14.16          | Gln129                        | -2.99           |
| 9        | Phe552    | Thr121                        | -6.48           | Glu123                        | -4.07           |
| 10       | Tyr551    | Val128                        | -0.23           | n                             | n               |
| 11       | Tyr553    | Val128                        | -2.56           | Ile126                        | -1.88           |
| 12       | Ser532    | Lys77(+)                      | -3.37           | Arg90(+)                      | -2.09           |
| 13       | Phe483    | Val74                         | -0.66           | Ser73                         | —               |
| 14       | Gly196    | Ile126                        | —               | Val128                        | —               |
| 15       | Pro554    | Thr121                        | —               | His61                         | —               |
| 16       | Tyr541    | Arg130(+)                     | -1.96           | Asn76                         | -0.38           |
| 17       | Thr192    | Arg130(+)                     | —               | Gln129                        | —               |
| 18       | Ile194    | Val128                        | -2.19           | Thr121                        | -0.75           |
| 19       | Val534    | His61                         | -0.66           | Ser80                         | -0.42           |
| 20       | Tyr543    | Glu75(-)                      | -2.21           | Asn76                         | —               |

| (b) Nectin-4 |           |                                  |                    |                                  |                    |
|--------------|-----------|----------------------------------|--------------------|----------------------------------|--------------------|
| Rank         | MVH a.a.  | 2 <sup>nd</sup> receptor<br>a.a. | IFIE<br>(kcal/mol) | 3 <sup>rd</sup> receptor<br>a.a. | IFIE<br>(kcal/mol) |
| 1            | Arg547(+) | Phe106                           | -3.26              | Gln107                           | -1.36              |
| 2            | Ser550    | Glu29(-)                         | -3.73              | Gly1                             | —                  |
| 3            | Gln391    | Lys54(+)                         | -3.16              | n                                | n                  |
| 4            | Tyr543    | Ala103                           | -5.21              | Pro102                           | -2.27              |
| 5            | Thr392    | Tyr55                            | —                  | n                                | n                  |
| 6            | Leu500    | Ser53                            | -2.16              | Gly32                            | -2.13              |
| 7            | Leu464    | Ala103                           | -3.74              | Ser105                           | -1.10              |
| 8            | Phe483    | Gly104                           | -2.54              | Ser99                            | -2.12              |
| 9            | Gly506    | n                                | n                  | n                                | n                  |
| 10           | Ser548    | Phe106                           | -2.09              | Gly104                           | -0.39              |
| 11           | Gly465    | Gly104                           | —                  | Pro102                           | —                  |
| 12           | Gly388    | Lys54(+)                         | -1.56              | Gly56                            | -0.16              |
| 13           | Tyr499    | Tyr55                            | -0.32              | n                                | n                  |
| 14           | Tyr524    | Phe106                           | -1.21              | Ser105                           | -0.59              |
| 15           | Lys460(+) | n                                | n                  | n                                | n                  |
| 16           | Val485    | His52                            | -0.63              | Leu50                            | -0.04              |
| 17           | Pro486    | Leu50                            | -0.42              | n                                | n                  |
| 18           | Ala463    | n                                | n                  | n                                | n                  |
| 19           | Pro458    | Pro102                           | -0.11              | Phe101                           | —                  |
| 20           | Ile390    | n                                | n                  | n                                | n                  |

| (c) CD46 |           |                               |                 |                               |                 |
|----------|-----------|-------------------------------|-----------------|-------------------------------|-----------------|
| Rank     | MVH a.a.  | 2 <sup>nd</sup> receptor a.a. | IFIE (kcal/mol) | 3 <sup>rd</sup> receptor a.a. | IFIE (kcal/mol) |
| 1        | Lys477(+) | Gln75                         | -5.20           | Ala76                         | —               |
| 2        | Glu503(-) | Thr42                         | -7.76           | Leu40                         | -2.59           |
| 3        | Gly546    | Val113                        | -3.38           | Ala114                        | -1.51           |
| 4        | Lys488(+) | Asn80                         | -0.59           | Thr82                         | —               |
| 5        | Tyr481    | Tyr67                         | -3.85           | Tyr83                         | -3.21           |
| 6        | Glu471(-) | Tyr67                         | -21.12          | Asp70(-)                      | —               |
| 7        | His448    | Tyr67                         | -2.08           | Ile68                         | -1.38           |
| 8        | Pro501    | Leu40                         | -0.88           | Ser56                         | -0.82           |
| 9        | Phe483    | Ile37                         | -2.13           | Phe35                         | -0.73           |
| 10       | Pro486    | Gly81                         | -2.39           | n                             | n               |
| 11       | Tyr543    | Tyr36                         | -2.94           | Phe35                         | -1.31           |
| 12       | Arg547(+) | Ser112                        | -9.34           | Val113                        | —               |
| 13       | Thr498    | n                             | n               | n                             | n               |
| 14       | Val485    | Tyr61                         | —               | n                             | n               |
| 15       | Tyr541    | Tyr36                         | -1.49           | Ile37                         | -1.12           |
| 16       | His495    | Gly81                         | —               | n                             | n               |
| 17       | Val451    | Arg69(+)                      | -1.51           | n                             | n               |
| 18       | Pro545    | Thr64                         | -0.90           | Phe35                         | -0.59           |
| 19       | Thr469    | n                             | n               | n                             | n               |
| 20       | Leu462    | Leu40                         | -0.55           | n                             | n               |

The 1<sup>st</sup> amino-acid (a.a.) residues which showed the highest IFIEs are shown in Table 2 in the main text. The “+” and “-” symbols in the parentheses after the residue names refer to the positively and negatively charged residues, respectively. The “n” symbol indicates that there is no residue in the receptor within the distance of 5 Å from the respective MVH residue. The “—” symbol indicates that the pertinent residue in the receptor shows the (small) repulsive interaction with the respective MVH residue.

Table S2. Effects of amino-acid (a.a.) substitution G546S of MVH on the distances and IFIEs between the residues of the Chain D of CD46 and the respective corresponding residues of MVH.

| Residue (a.a.) of Chain D of CD46 | Before substitution |              |                 | After substitution |              |                 |
|-----------------------------------|---------------------|--------------|-----------------|--------------------|--------------|-----------------|
|                                   | MVH a.a.            | Distance (Å) | IFIE (kcal/mol) | MVH a.a.           | Distance (Å) | IFIE (kcal/mol) |
| Glu63                             | Pro545              | 2.4          | -1.9            | Pro545             | 2.4          | -1.1            |
| Glu63                             | Gly546              | 1.7          | -27.2           | Ser546             | 1.4          | -24.5           |
| Val113                            | Gly546              | 2.7          | -3.4            | Ser546             | 2.2          | -4.4            |
| Ser112                            | Gly546              | 4.6          | -0.2            | Ser546             | 4.1          | -1.3            |
| Glu63                             | Arg547              | 3.8          | -45.4           | Arg547             | 3.5          | -63.0           |
| Ser112                            | Arg547              | 2.4          | -9.3            | Arg547             | 2.1          | -8.8            |
| Val113                            | Arg547              | 3.5          | 1.9             | Arg547             | 3.2          | -2.0            |
| Ala114                            | Arg547              | 4.6          | 3.5             | Arg547             | 4.1          | 4.9             |
| Lys32                             | Arg547              | 4.1          | 43.1            | Arg547             | 4.6          | 37.3            |
